# Supplementary material for: Bayesian graphical models for regression on multiple data sets with different variables
Source: PubMed Central journal article supplement — Biostatistics. 2008 Nov 27;10(2):335–51. doi: 10.1093/biostatistics/kxn041 (PMC2648903; doi:10.1093/biostatistics/kxn041), 2008-11-27
Supplement: kxn041_1.pdf [file kxn041_1.pdf]

Supplementary material to *Bayesian graphical models for regression on multiple datasets with different variables* (C. H. Jackson <sup>1</sup>, N. G. Best and S. Richardson <sup>2</sup>).

Table 2: Associations of birth outcomes (posterior mean and 95% credible interval) with NO<sub>2</sub> and SO<sub>2</sub> exposure. Units of exposure defined by the interquartile range of background pollution concentrations across England and Wales: 14.5  $\mu\text{g}/\text{m}^3$  for NO<sub>2</sub> and 1.9  $\mu\text{g}/\text{m}^3$  for SO<sub>2</sub>. All models adjusted for ethnicity and smoking unless stated otherwise.

|                                                                | Odds ratio (NO <sub>2</sub> )           | Odds ratio (SO <sub>2</sub> )      |
|----------------------------------------------------------------|-----------------------------------------|------------------------------------|
| <b>Low birth weight</b>                                        |                                         |                                    |
| Register (unadjusted for ethnicity and smoking)                | 1.15 (1.07, 1.23)                       | 1.00 (0.97, 1.04)                  |
| MCS                                                            | 0.94 (0.79, 1.13)                       | 1.03 (0.94, 1.12)                  |
| Combined                                                       | 0.98 (0.91, 1.04)                       | 1.02 (0.98, 1.05)                  |
| Register                                                       | 0.97 (0.90, 1.03)                       | 1.01 (0.98, 1.05)                  |
| Combined (ignoring selection)                                  | 1.00 (0.94, 1.06)                       | 1.02 (0.98, 1.06)                  |
| MCS (unadjusted for ethnicity and smoking)                     | 1.08 (0.92, 1.29)                       | 1.04 (0.95, 1.13)                  |
| Combined (no ecological data in imputation)                    | 1.03 (0.96, 1.10)                       | 1.01 (0.97, 1.04)                  |
| Combined (no ecological data or NO <sub>2</sub> in imputation) | 1.12 (1.05, 1.19)                       | 1.00 (0.97, 1.04)                  |
| Combined (confounders imputed in MCS)                          | 0.98 (0.91, 1.04)                       | 1.02 (0.99, 1.06)                  |
| Combined (no cut)                                              | 0.82 (0.76, 0.88)                       | 1.04 (1.00, 1.08)                  |
| Combined (adjusting for season of birth)                       | 0.97 (0.91, 1.04)                       | 1.02 (0.99, 1.05)                  |
| <b>Low full term birth weight</b>                              |                                         |                                    |
| MCS                                                            | 0.92 (0.72, 1.16)                       | 1.04 (0.92, 1.18)                  |
| <b>Preterm birth</b>                                           |                                         |                                    |
| MCS                                                            | 0.97 (0.82, 1.14)                       | 1.01 (0.93, 1.09)                  |
| <b>Continuous birth weight (g)</b>                             |                                         |                                    |
| Combined                                                       | NO <sub>2</sub><br>-31.2 (-39.6, -22.8) | SO <sub>2</sub><br>1.1 (-3.6, 5.8) |

<sup>1</sup>MRC Biostatistics Unit, Cambridge

<sup>2</sup>Imperial College London

Table 3: Odds ratios of low birth weight or preterm birth, or change in continuous birth weight, associated with ethnicity and smoking (posterior mean and 95% credible interval)

|                                                                | Ethnicity (baseline: White) |                         |                       |                      |
|----------------------------------------------------------------|-----------------------------|-------------------------|-----------------------|----------------------|
|                                                                | Smoking                     | South Asian             | Black                 | Other                |
| <b>Low birth weight</b>                                        |                             |                         |                       |                      |
| MCS                                                            | 1.97 (1.68, 2.30)           | 2.76 (2.12, 3.58)       | 1.78 (1.26, 2.48)     | 1.63 (1.14, 2.29)    |
| Combined                                                       | 1.93 (1.79, 2.09)           | 2.60 (2.30, 2.91)       | 1.78 (1.50, 2.10)     | 1.55 (1.28, 1.84)    |
| Register                                                       | 1.94 (1.77, 2.12)           | 2.94 (2.58, 3.35)       | 1.99 (1.63, 2.42)     | 1.61 (1.29, 1.97)    |
| Combined (ignoring selection)                                  | 1.93 (1.79, 2.10)           | 2.69 (2.40, 3.00)       | 1.81 (1.52, 2.12)     | 1.57 (1.30, 1.87)    |
| MCS (unadjusted for ethnicity and smoking)                     |                             |                         |                       |                      |
| Combined (no ecological data in imputation)                    | 1.83 (1.69, 1.97)           | 2.21 (1.93, 2.52)       | 1.57 (1.30, 1.90)     | 1.49 (1.25, 1.75)    |
| Combined (no ecological data or NO <sub>2</sub> in imputation) | 1.21 (1.12, 1.30)           | 1.25 (1.13, 1.39)       | 1.05 (0.94, 1.16)     | 1.10 (0.96, 1.25)    |
| Combined (confounders imputed in MCS)                          | 1.92 (1.78, 2.08)           | 2.58 (2.29, 2.91)       | 1.77 (1.48, 2.11)     | 1.54 (1.26, 1.85)    |
| Combined (no cut)                                              | 8.98 (7.93, 10.27)          | 11.68 (10.01, 13.65)    | 3.38 (2.63, 4.35)     | 2.22 (1.60, 2.97)    |
| Combined (adjusting for season of birth)                       | 1.93 (1.79, 2.09)           | 2.60 (2.32, 2.92)       | 1.79 (1.50, 2.10)     | 1.56 (1.28, 1.86)    |
| <b>Low full term birth weight</b>                              |                             |                         |                       |                      |
| MCS                                                            | 2.78 (2.16, 3.54)           | 6.27 (4.48, 8.79)       | 2.90 (1.79, 4.52)     | 2.40 (1.39, 3.85)    |
| <b>Preterm birth</b>                                           |                             |                         |                       |                      |
| MCS                                                            | 1.28 (1.11, 1.48)           | 1.21 (0.92, 1.58)       | 1.32 (0.93, 1.81)     | 1.08 (0.74, 1.55)    |
| <b>Continuous birth weight (g)</b>                             |                             |                         |                       |                      |
| Combined                                                       | -72.0 (-83.8, -60.1)        | -167.8 (-187.8, -148.5) | -81.5 (-106.6, -56.7) | -70.8 (-96.5, -45.1) |

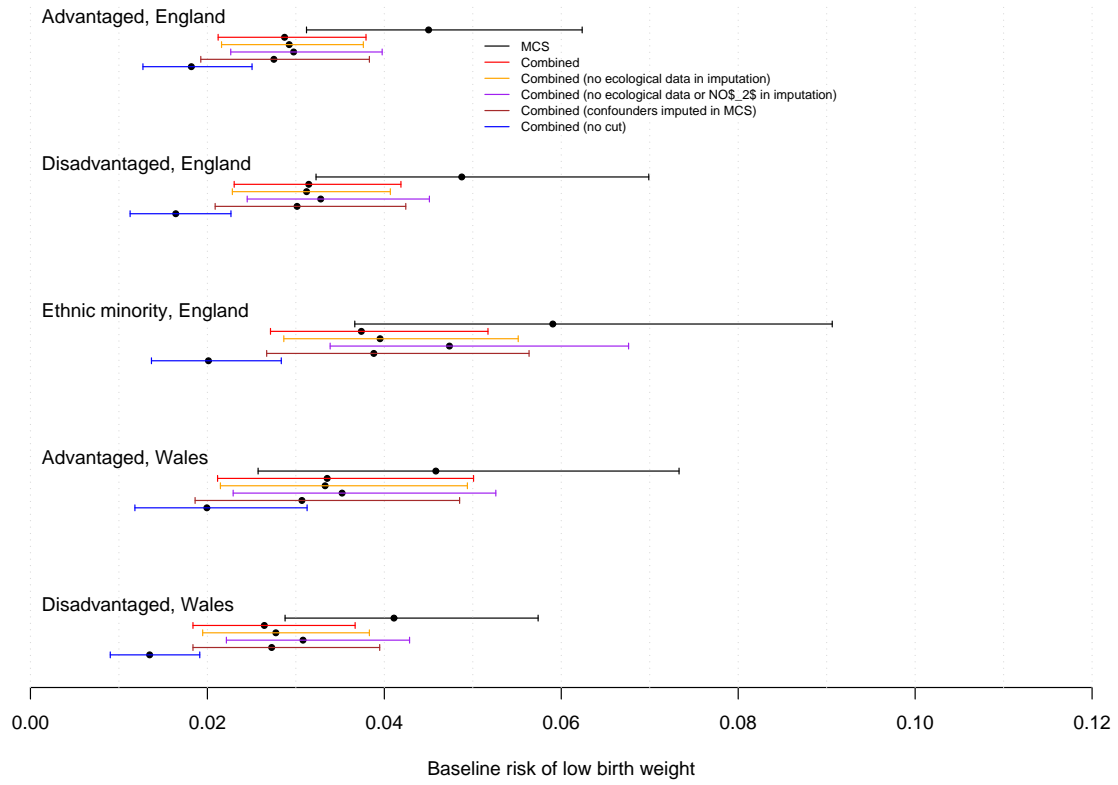

Figure 5: Baseline probability  $\text{expit}(\mu_s)$  of low birth weight within each MCS sampling stratum  $s = 1, \dots, 5$ .

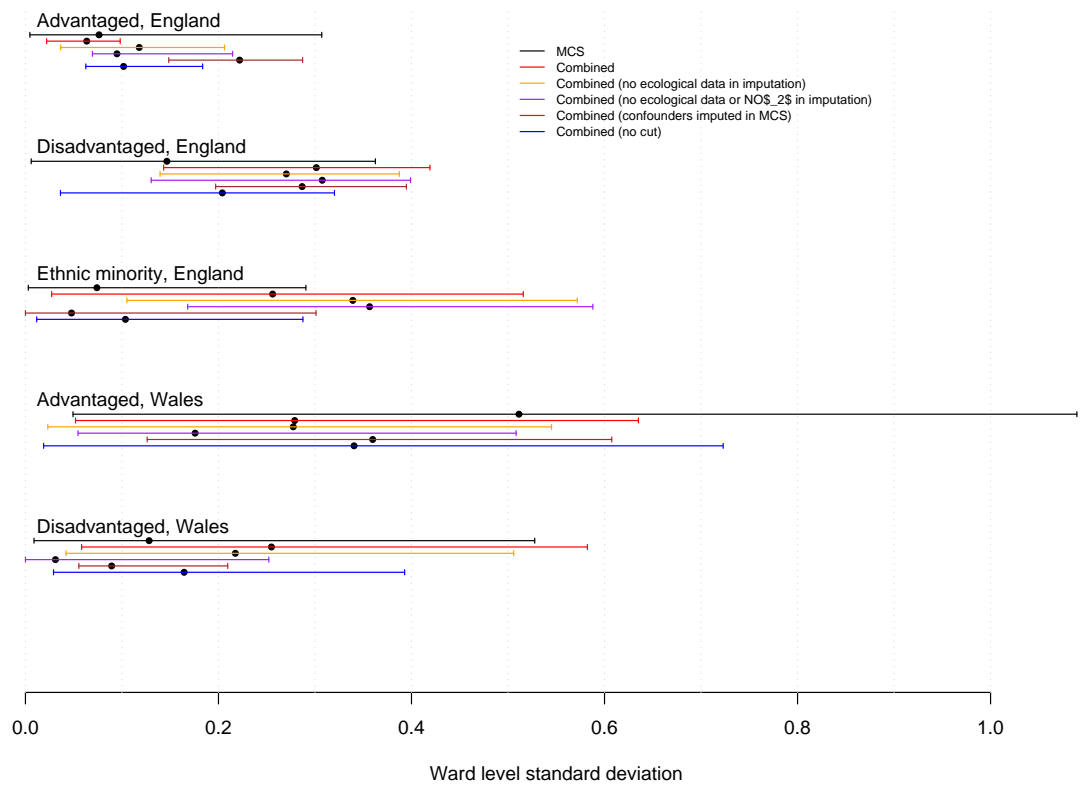

Figure 6: Ward-level standard deviation  $\sigma_s$  of logit baseline risk of low birth weight, representing the extend of ward-level clustering within each MCS sampling stratum  $s = 1, \dots, 5$ .
